# Supplementary material
Source: Springer Nature journal article supplement (https://www.springerprofessional.de/resource/supplementary/13638_2012_767_MOESM14_ESM.pdf/11898388)

(a) Correlation coefficient in symmetric scenario

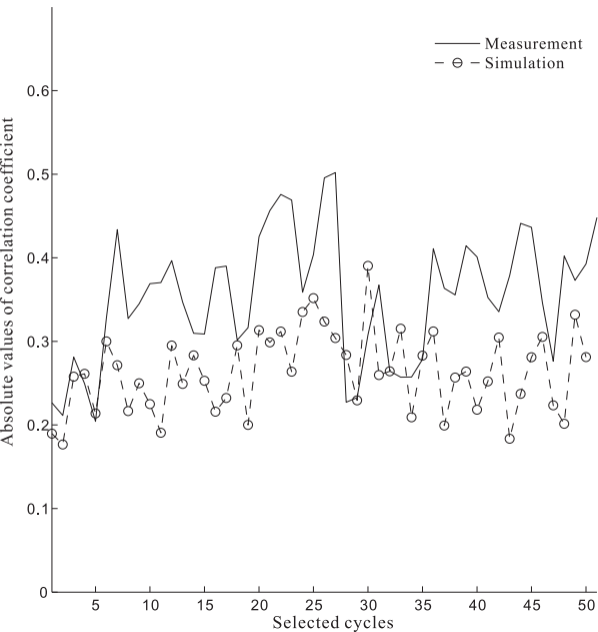

(b) CDF of the correlation coefficient in symmetric scenario

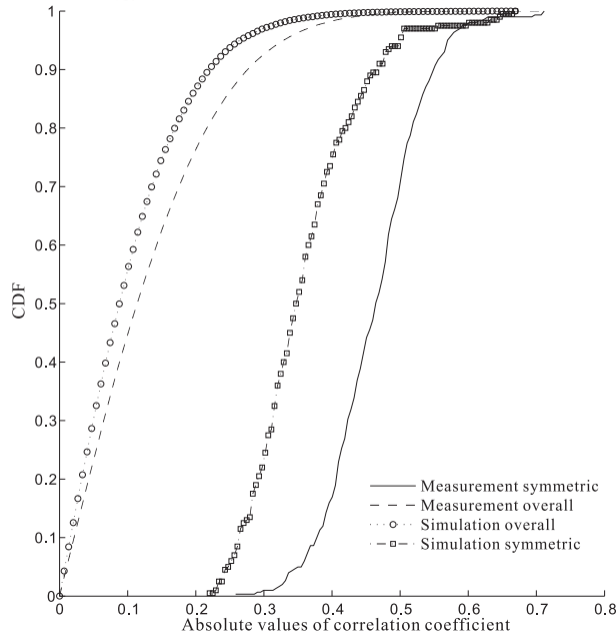

Supplement: MOESM14 [file 11898388]
